# Supplementary material for: Pairing mechanism and superconductivity in pressurized La5Ni3O11
Source: Research Square preprint supplement (doi:10.21203/rs.3.rs-6852646/v1), 2025-06-30
Supplement: Supplementary file 1 [file c4f984752815ba86f05f7a02.pdf]

# Supplementary Information for “ Pairing mechanism and superconductivity in pressurized $\text{La}_5\text{Ni}_3\text{O}_{11}$ ”

Ming Zhang,<sup>1,\*</sup> Cui-Qun Chen,<sup>2,\*</sup> Dao-Xin Yao,<sup>2,†</sup> and Fan Yang<sup>3,‡</sup>

<sup>1</sup>*Zhejiang Key Laboratory of Quantum State Control and Optical Field Manipulation,  
Department of Physics, Zhejiang Sci-Tech University, 310018 Hangzhou, China*

<sup>2</sup>*Center for Neutron Science and Technology, Guangdong Provincial Key Laboratory of Magnetoelectric Physics and Devices,  
State Key Laboratory of Optoelectronic Materials and Technologies,  
School of Physics, Sun Yat-Sen University, Guangzhou 510275, China*

<sup>3</sup>*School of Physics, Beijing Institute of Technology, Beijing 100081, China*

## CONTENTS

|                                                                                          |   |
|------------------------------------------------------------------------------------------|---|
| A. Phonon spectrum of $\text{La}_5\text{Ni}_3\text{O}_{11}$                              | 1 |
| B. Band structures of $\text{La}_5\text{Ni}_3\text{O}_{11}$ at ambient and high pressure | 1 |

### A. PHONON SPECTRUM OF $\text{La}_5\text{Ni}_3\text{O}_{11}$

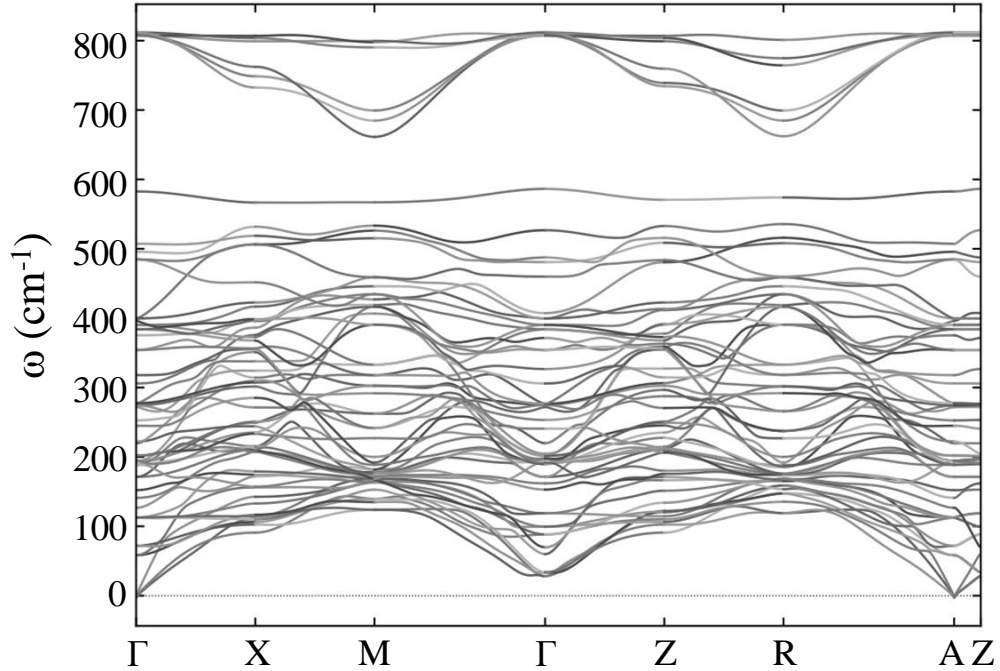

FIG. S1: Phonon spectrum of the  $P4/mmm$  (No. 123) phase  $\text{La}_5\text{Ni}_3\text{O}_{11}$  under high pressure.

### B. BAND STRUCTURES OF $\text{La}_5\text{Ni}_3\text{O}_{11}$ AT AMBIENT AND HIGH PRESSURE

---

\* These two authors contributed equally to this work.

† [yaodaox@mail.sysu.edu.cn](mailto:yaodaox@mail.sysu.edu.cn)

‡ [yangfan\\_blg@bit.edu.cn](mailto:yangfan_blg@bit.edu.cn)

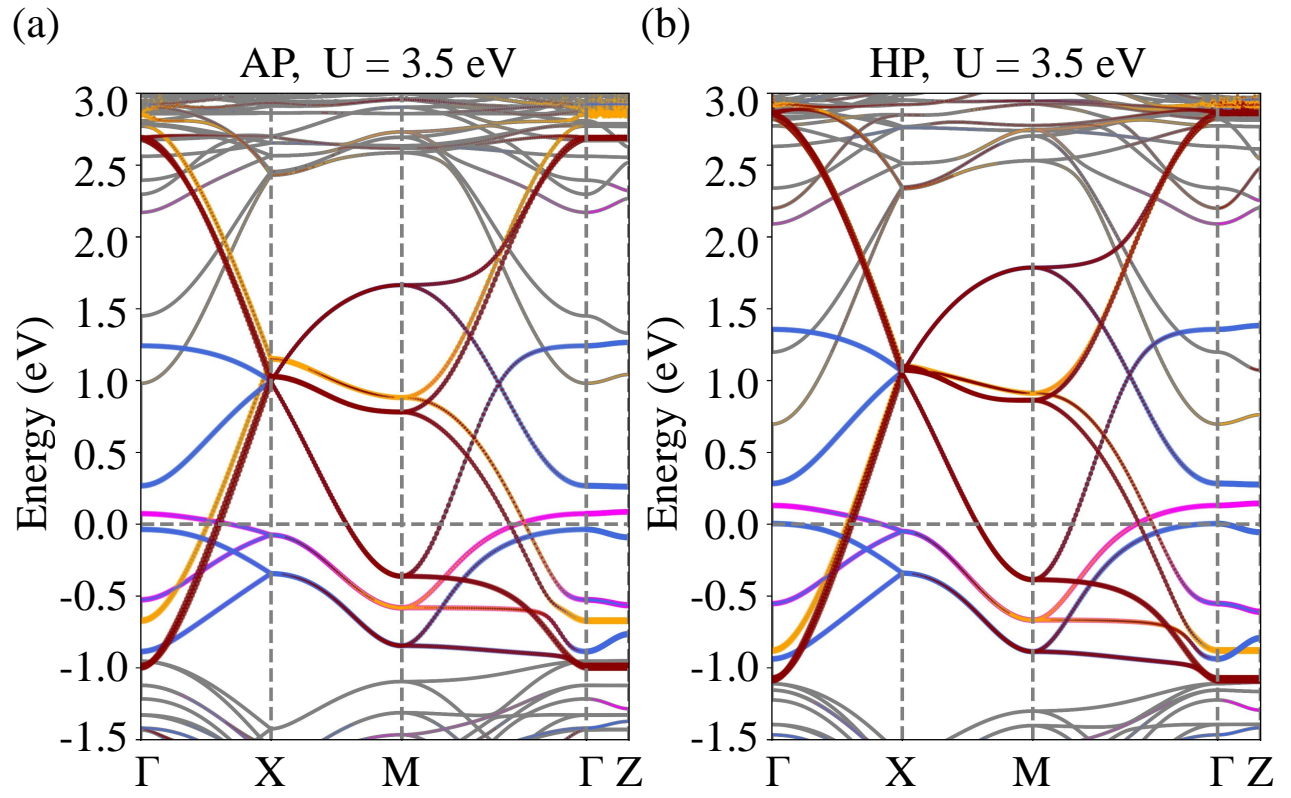

FIG. S2: (color online) Band structures of  $\text{La}_5\text{Ni}_3\text{O}_{11}$  at ambient pressure (a) and high pressure (b).
